# Supplementary material for: High Pressure Brillouin Spectroscopy and X-ray Diffraction of Cerium Dioxide
Source: MDPI journal article supplement (doi:10.3390/ma14133683), 2021-07-01
Supplement: s1 [file s1]

## Supplemental Materials – High Pressure Brillouin Spectroscopy and X-ray Diffraction of Cerium Dioxide

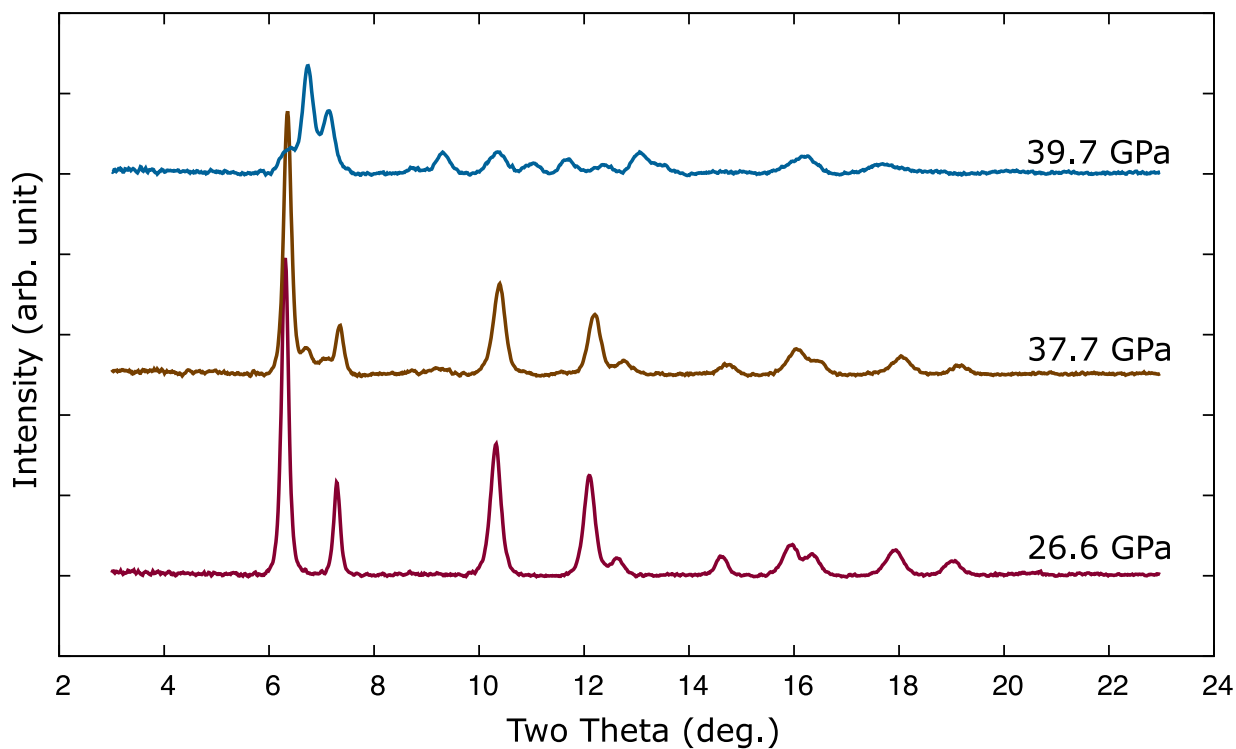

Supplemental Figure 1: Integrated powder x-ray diffraction patterns of cerium dioxide on compression past the Fm-3m to Pnam transition nominally at 31 GPa. Only a little conversion occurs up to 37.7 GPa with some of the low-pressure phase persisting up to the highest pressures.
